# Supplementary material for: In vivo MRI of the human finger at 7 T
Source: PubMed Central journal article supplement (PMC5763334; doi:10.1002/mrm.26645), 2017-03-10
Supplement: MRM-79-588-s001.pdf [file MRM-79-588-s001.pdf]

Supporting Figure S1.

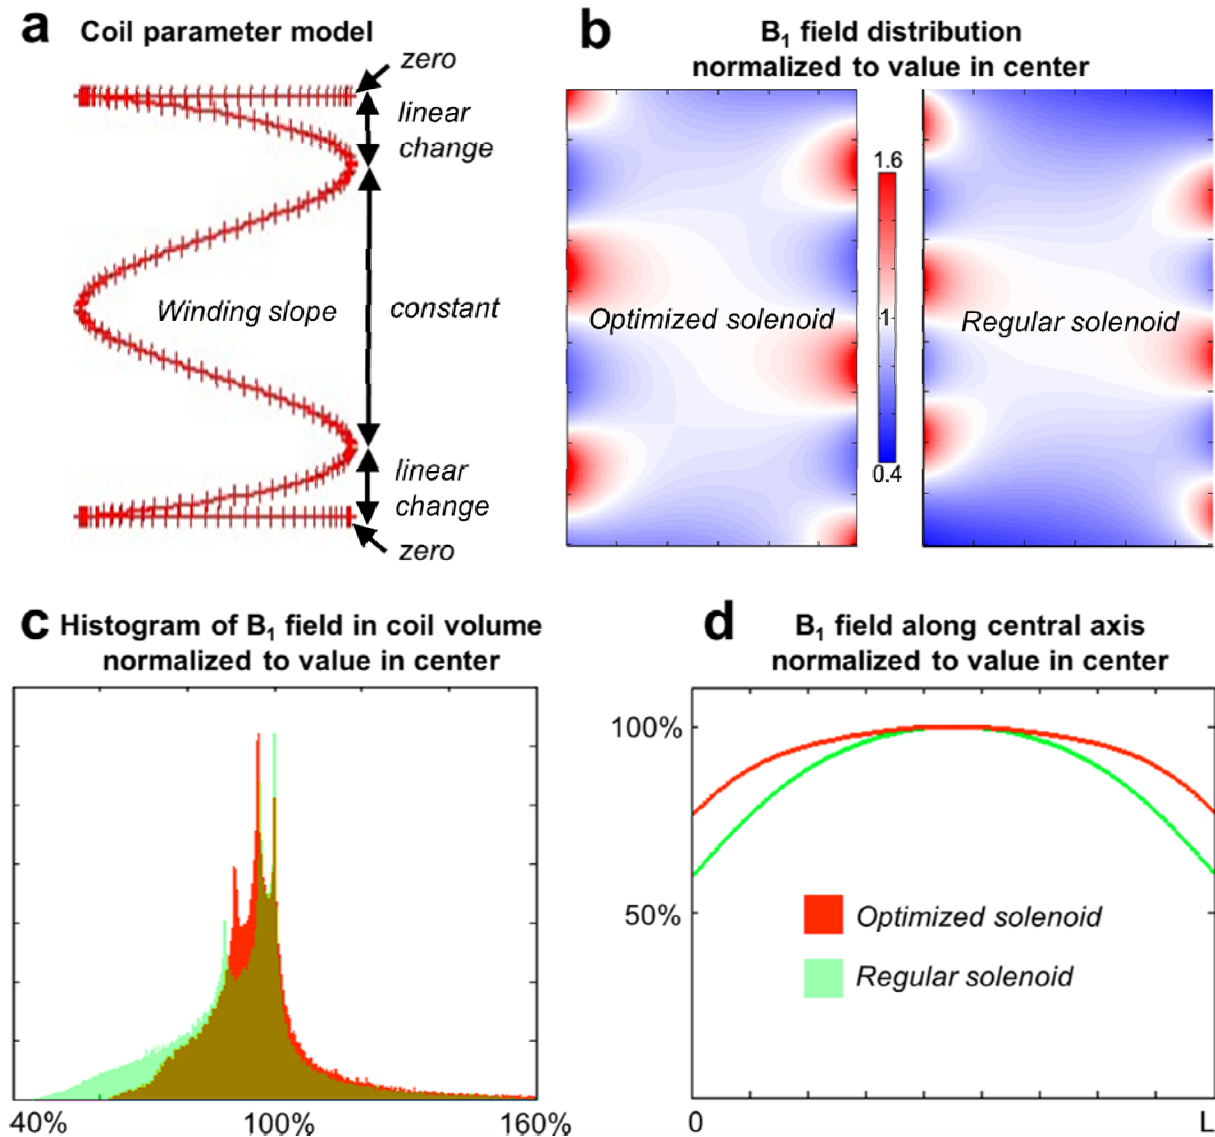

### RF coil design and optimization.

- The helical structure with variable slope parameter is shown exemplarily for  $\alpha = \beta = 180^\circ$ . The segments with zero, linearly changing, and constant winding slope are marked by arrows.
- Simulated  $B_1$  field distribution for the optimized geometry (left) and a regularly wound solenoid (right) as a reference.
- Histogram of the  $B_1$  field in the inner coil volume showing the improvement in homogeneity of the optimized solenoid (red) versus the regular solenoid (green). The overlap of the red and green areas is shown in a brownish color.
- Line plot of the  $B_1$  field amplitude along the central axis of the solenoid. It can be seen that the drop-off at the edges is reduced from  $\sim 45\%$  to  $\sim 25\%$  of the central value for the optimized solenoid.

Supporting Table S2.

**Signal-to-noise ratios and Contrast-to-noise ratios for MR sequence #3.**

| MR sequence #3             | SNR | CNR      |       |                            |        |
|----------------------------|-----|----------|-------|----------------------------|--------|
|                            |     | Arteries | Veins | Vater-Pacini<br>Corpuscles | Nerves |
| Tendons                    | 11  | 31       | 29    | 18                         | 21     |
| Nerves                     | 29  | 12       | 10    | 3                          |        |
| Vater-Pacini<br>Corpuscles | 33  | 9        | 7     |                            |        |
| Veins                      | 40  | 2        |       |                            |        |
| Arteries                   | 42  |          |       |                            |        |
